# Supplementary material for: Delivering Prognostic News to Older People with Chronic Disease: What Format Preference and Level of Involvement in Decision Making? A Hospital Survey
Source: MDPI journal article supplement (doi:10.3390/healthcare11030444), 2023-02-03
Supplement: s1 [file s1]

## Supplementary Materials

### Survey questionnaire contents

Note: For surrogate respondents, wording of questions was modified for example 'your health' was modified to read 'your loved one's health'

| Survey question and instructions                                                                                                                                                                                                                                                                         | Survey response options                                                                                                                                                                                                                                                                                                                                                                                                                                                                                                                                                                                                                                                                     |
|----------------------------------------------------------------------------------------------------------------------------------------------------------------------------------------------------------------------------------------------------------------------------------------------------------|---------------------------------------------------------------------------------------------------------------------------------------------------------------------------------------------------------------------------------------------------------------------------------------------------------------------------------------------------------------------------------------------------------------------------------------------------------------------------------------------------------------------------------------------------------------------------------------------------------------------------------------------------------------------------------------------|
| Participant health and socio-demographic characteristics<br><br><i>(If surrogate is the participant, record the surrogate's level of education, ethnicity, and religion)</i>                                                                                                                             | Age, gender, reason for hospitalization, admitting ward, life-limiting condition, time since diagnosis, language spoken at home, level of education, ethnicity, religion, country of birth, living arrangements, post code, etc.                                                                                                                                                                                                                                                                                                                                                                                                                                                            |
| Survey completed with                                                                                                                                                                                                                                                                                    | <input type="checkbox"/> Patient<br><input type="checkbox"/> Surrogate<br><input type="checkbox"/> Patient and Surrogate                                                                                                                                                                                                                                                                                                                                                                                                                                                                                                                                                                    |
| What would you say is most important to your health and well-being?<br><br><i>(Select minimum of 1 and maximum of 3 options)</i>                                                                                                                                                                         | <input type="checkbox"/> Principles - the things you believe in<br><input type="checkbox"/> Relationships - with your family, loved ones, friend, and pets<br><input type="checkbox"/> Emotions - such as your feelings and mood<br><input type="checkbox"/> Activities - such as work, hobbies, volunteering<br><input type="checkbox"/> Abilities - your physical or mental capacity or skills<br><input type="checkbox"/> Possessions - your objects and belongings which what personal meaning<br><input type="checkbox"/> Prefer not to say                                                                                                                                            |
| I want you to think about a situation when you would need to make an important decision about treatment for your [insert patient's chronic condition]. Would you prefer to:<br><br><i>(Select maximum of 3 options)</i>                                                                                  | <input type="checkbox"/> Have the final choice about your treatment<br><input type="checkbox"/> Make a decision after serious consideration your doctor's opinions<br><input type="checkbox"/> Share the responsibility of the decision making with your doctor regarding which treatment is best for you<br><input type="checkbox"/> Share the responsibility of the decision making with your doctor and your family regarding which treatment is best for you<br><input type="checkbox"/> Let your doctor decide which treatment is best on your behalf<br><input type="checkbox"/> Let your family decide with your doctor on your behalf<br><input type="checkbox"/> Prefer not to say |
| How much information would you like to know about what brought you to hospital and whether it will get better or worse in the next few months? [Ask participant to explain their response by asking them why they chose that answer. Please document reason]<br><br><i>(Select maximum of 1 options)</i> | <input type="checkbox"/> I would want to know everything<br><i>Reason</i> _____<br><input type="checkbox"/> I would want to know some information<br><i>Reason</i> _____<br><input type="checkbox"/> I would not want to know anything<br><i>Reason</i> _____<br><input type="checkbox"/> Prefer not to say                                                                                                                                                                                                                                                                                                                                                                                 |
| What are the types of things that you would like to know about your condition? [Do not prompt participant at first. Write down what the participant says or tick as many options stated as are relevant]<br><br><i>(Select all options stated that are relevant)</i>                                     | <input type="checkbox"/> Participant Response _____<br><input type="checkbox"/> Benefits of treatment<br><input type="checkbox"/> Treatment risks or side effects<br><input type="checkbox"/> Chances of cure<br><input type="checkbox"/> Impact of treatment on quality of life<br><input type="checkbox"/> Changes of complications<br><input type="checkbox"/> Impact of treatment/management on family or carers<br><input type="checkbox"/> Cost of treatment/management                                                                                                                                                                                                               |

|                                                                                                                                                                                                                                                                                                                                                                                                                                                                                                                                                                                                        |                                                                                                                                                                                                                                                                                                                                                                                                                                                                                                                                                                                                                                                                                                                                                                                                                    |
|--------------------------------------------------------------------------------------------------------------------------------------------------------------------------------------------------------------------------------------------------------------------------------------------------------------------------------------------------------------------------------------------------------------------------------------------------------------------------------------------------------------------------------------------------------------------------------------------------------|--------------------------------------------------------------------------------------------------------------------------------------------------------------------------------------------------------------------------------------------------------------------------------------------------------------------------------------------------------------------------------------------------------------------------------------------------------------------------------------------------------------------------------------------------------------------------------------------------------------------------------------------------------------------------------------------------------------------------------------------------------------------------------------------------------------------|
|                                                                                                                                                                                                                                                                                                                                                                                                                                                                                                                                                                                                        | <input type="checkbox"/> Other treatment alternatives<br><input type="checkbox"/> Explanation of how the disease will progress<br><input type="checkbox"/> Expected survival time<br><input type="checkbox"/> Prefer not to say                                                                                                                                                                                                                                                                                                                                                                                                                                                                                                                                                                                    |
| If you were to receive news about how your current health issues will progress in the future, how would you prefer to receive the news?<br><br><i>(Select maximum of 1 options)</i>                                                                                                                                                                                                                                                                                                                                                                                                                    | <input type="checkbox"/> Verbal information from the doctor<br><input type="checkbox"/> Verbal information from the doctor plus graphs outlining my condition, treatment options and progression<br><input type="checkbox"/> Verbal information from the doctor plus tables outlining my condition, treatment options and progression<br><input type="checkbox"/> Verbal information from the doctor plus pictures of the treatment I would have to undergo in the future<br><input type="checkbox"/> Verbal information from the doctor plus a pamphlet outlining my condition, treatment options and progression<br><input type="checkbox"/> Verbal information from the doctor plus a link to a website outlining my condition, treatment options and progression<br><input type="checkbox"/> Prefer not to say |
| Show participant card with <b>hypothetical scenario options</b> * Explain to participant "That the following examples that I will show you are only hypothetical. They do not apply to your specific scenario"<br><br>Hypothetical Scenario Order Sequence as per Randomisation<br>Verbal Information from doctor with<br>■Written summary<br>■Graphs<br>■Table with numbers<br>■Picture of patient procedure<br>■Video<br>■Pamphlet<br><i>For each hypothetical scenario participant to specify their preference (Likert scale); reason for preference (free text); distress scale (Likert scale)</i> | <p>1. On a scale of 1 to 5, how much would you like to be shown [insert hypothetical scenario]</p> <p>Dislikes it strongly <span style="float: right;">Likes it strongly</span></p> <p>___1___2___3___4___5___</p> <p>2. Please comment on your reason for this preference</p> <p>Reason _____</p> <p>3. On a scale of 1 to 5, how distressing did you find [insert hypothetical scenario]</p> <p>Not at all distressing <span style="float: right;">Very distressing</span></p> <p>___1___2___3___4___5___</p>                                                                                                                                                                                                                                                                                                    |

## \*Hypothetical scenario options presented to participant

### Verbal information from the doctor and a summary of a condition and treatment options

**Visit Summary**

**Key points we discussed today:**

- Your diagnosis is a chronic lung condition
- Your oxygen saturation is below 90% most of the day
- Your lung capacity is severely reduced to 50% of normal volume in an adult

**Treatment options for you and outlook:**

- A physiotherapist can teach you techniques to reduce your breathing effort.
- This won't extend your life, but it will help enhance your quality of life.
- An occupational therapist can help you to continue to keep doing the everyday activities you wish to continue.
- In the end-stage of your diagnosis you'll likely need supplemental oxygen to breathe and you may not be able to complete activities of daily living.
- If your lung capacity is less than 35% you may not survive beyond four years after this result.

**Instructions:**

- Use the nicotine patches to help you stay off smoking
- Try to maintain your weight; do not lose weight because you will become frailer and less able to mobilise yourself.
- If your shortness of breath is hard to manage or you cannot walk too far in six minutes this means your condition has progressed, and you may benefit from additional palliative or hospice care.

Contact Nurse XXX or Doctor YYY if you have any further questions

Treating doctor

Date

### Graph explaining the survival rates of a condition

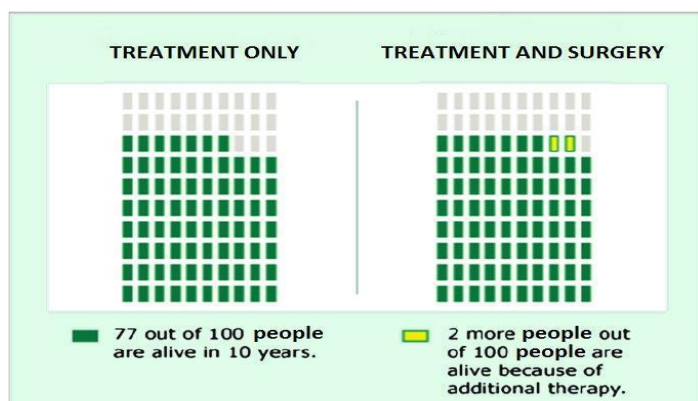

### Table containing numbers and percentages of survival rates of a condition

|               | 3-year survival | 5-year survival | 10-year survival |
|---------------|-----------------|-----------------|------------------|
| Chemotherapy  | 99 %            | 97 %            | 91 %             |
| Radiotherapy  | 95 %            | 89 %            | 67 %             |
| Surgery       | 89 %            | 81 %            | 50 %             |
| Immunotherapy | 70 %            | 57 %            | 39 %             |

Picture of a patient having a procedure completed

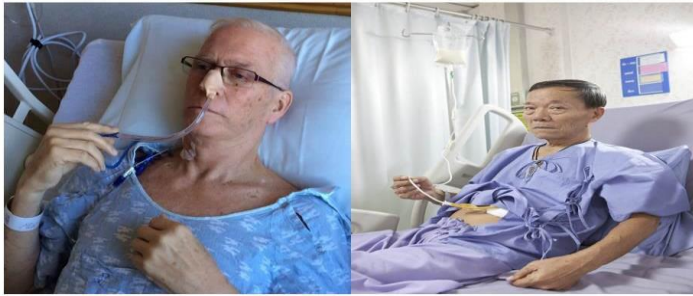

Video of what a procedure would entail?

Video can be accessed at this link ([133](#)) [Communicating Health Information Video Scenario V1 29 11 18 2018 - YouTube](#)

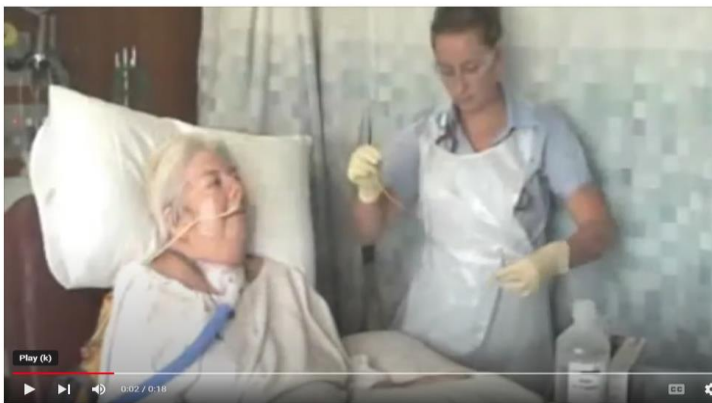

Communicating Health Information Video Scenario V1 29 11 18 2018

Pamphlet on a condition and it's treatment options

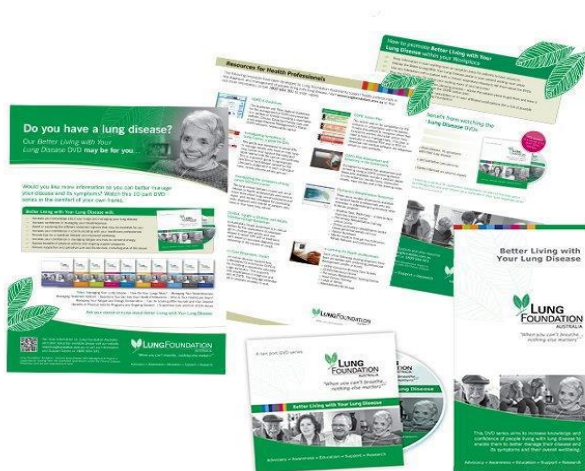

Accessed from the Lung Foundation , Australia. <https://lungfoundation.com.au/resources/better-living-with-copd-booklet>

---
